# Supplementary material for: Tetramethylpyridiniumporphyrazines—a new class of G-quadruplex inducing and stabilising ligands
Source: Royal Society of Chemistry journal article supplement (doi:10.1039/b611731g), 2006-01-01
Supplement: b611731g.pdf [file b611731g.pdf]

## Tetramethylpyridiniumporphyrazines- a new class of G-Quadruplex Inducing and Stabilising Ligands

Diana P. N. Gonçalves, Raphaël Rodriguez, Shankar Balasubramanian, Jeremy K. M. Sanders\*

### Electronic supplementary information

In our studies we used the 5'-GGATTGGGATTGGGATTGGGATTGGG-3' sequence (*Htelo*). The *Htelo* was annealed in a 50 mM Tris (pH 7.4), 150 mM of KCl buffer by heating to 95°C for five minutes and then slowly cooled to room temperature. The presence of the G-quadruplex was then confirmed by CD spectroscopy.

Circular dichroism experiments, including the DNA melting, were performed on a JASCO model J-810 circular dichroism spectropolarimeter equipped with a Peltier temperature controller.

UV-Vis spectra were measured using a Carry 400 spectrophotometer. UV-vis spectra were recorded using a 1 cm path-length quartz cell.

Surface plasmon resonance was performed on a BIAcore 3000 instrument, using degassed and filtered Tris.HCl running buffer (50 mM Tris.HCl, 100 mM KCl, pH 7.4). Sensor chips (Type SA, Biacore) were loaded with approximately 600 RU of *Htelo* and duplex DNA. Six serial dilutions of compound were injected at a flow rate of 20  $\mu\text{L min}^{-1}$  and the equilibrium response determined relative to the base line (blank flow cell). The maximum concentration for both porphyrazines was 1.25  $\mu\text{M}$ . Between injections the sensor surface was refreshed with injections of 1 M KCl and buffer. All experiments were carried out in duplicate.

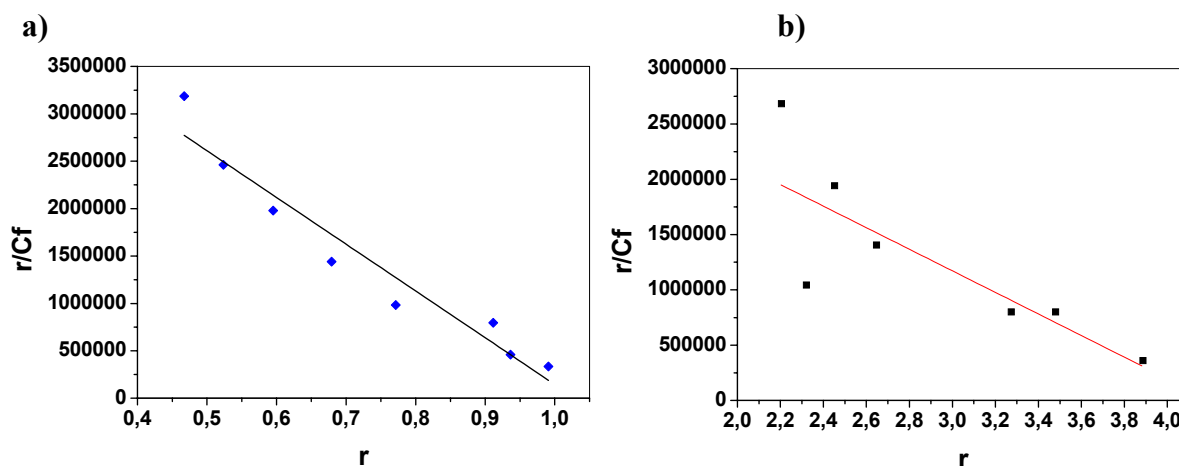

**Figure 1.** Scatchard binding plots ( $r/C_f$  vs  $r$ ) used to determine the affinity constants for: a) 3,4-TMPyPz; and b) 3,4-TMPyPz Zinc (II), with the *Htelo* G-quadruplex.

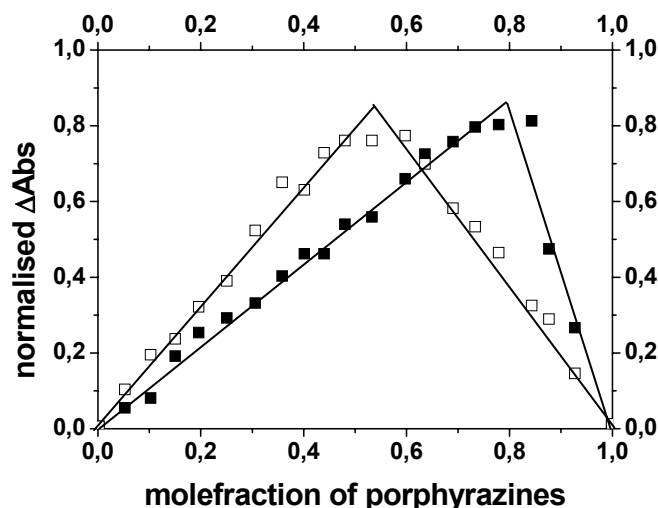

**Figure 2.** Job plots for the binding of the 3,4-TMPyPz ( $\square$ ) and of the 3,4-TmPyPz Zinc (II) ( $\blacksquare$ ) with the *Htelo* G-Quadruplex in a 50 mM Tris (pH 7.4), 150 mM of KCl buffer at 20°C. The sum of porphyrazines and *Htelo* G-Quadruplex concentrations were fixed at 5  $\mu$ M. Optical absorbances changes of the bound 3,4-TMPyPz at 388 nm, and at 398 nm for the 3,4-TMPyPz Zinc (II) were normalised to the maximum increase in each case. The Y-axis represents the differences in absorbance for mole fractions of ligand ( $\chi_L$ ) in G-quadruplex and in buffer alone. Intercept of the mole fraction values were determined from least-squares fits to the linear data points, giving  $\chi_{int}$  values of 0.52 (1.1:1 stoichiometry) for 3,4-TmPyPz and 0.80 (4.2:1 stoichiometry) for the 3,4-TMPyPz Zinc (II), respectively.

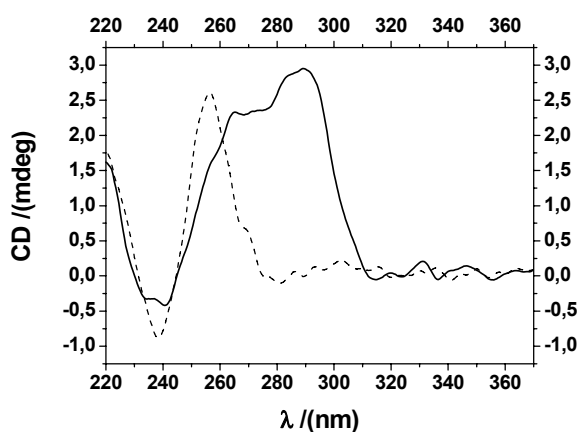

**Figure 3.** CD spectra of 10  $\mu$ M of annealed *Htelo* DNA in a 50 mM Tris (pH 7.4), 150 mM of KCl buffer (G-quadruplex) (solid line), showing its two characteristic parallel (at around 265 nm) and anti-parallel (at around 290 nm) conformations. Together with the CD spectra of 10  $\mu$ M of non-annealed *Htelo* (dashed line) in a 50 mM Tris (pH 7.4) buffer, showing its characteristic positive peak at around 255 nm. All experiments were carried out at 20°C.

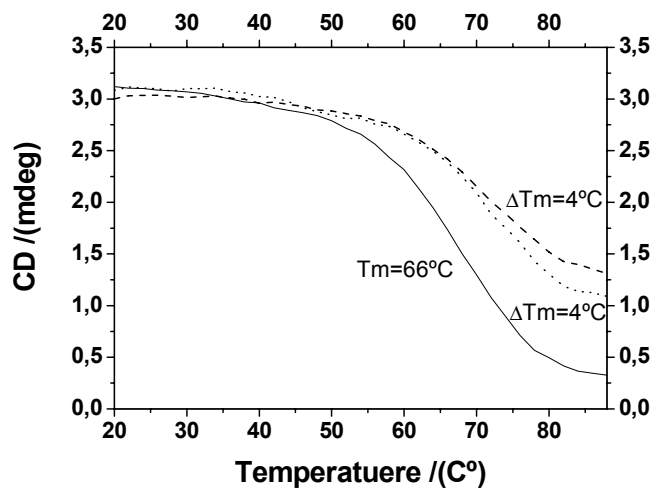

**Figure 4.** CD melting profiles monitored at 295 nm of 10  $\mu$ M of Htelo G-quadruplex in a 50 mM Tris (pH 7.4), 150 mM of KCl buffer (solid line) in the presence of 9 equiv. of 3,4-TmPyPz (dotted line) and of 9 equiv. of 3,4-TmPyPz Zinc (II) (dashed line) porphyrazines.
